# Supplementary material for: Development of a single port dual arm robotically steerable endoscope for neurosurgical applications
Source: PubMed Central journal article supplement — Npj Robot. 2025 Jan 8;3(1):1. doi: 10.1038/s44182-024-00017-w (PMC11706784; doi:10.1038/s44182-024-00017-w), 2025-01-08
Supplement: 44182_2024_17_MOESM1_ESM.pdf [file 44182_2024_17_MOESM1_ESM.pdf]

## Supplementary Materials

1. Video 1: Joystick controlled operation of the robotically steerable endoscope
2. Video 2: Camera view of the robotically steerable endoscope
